# Supplementary material for: Association Between Insulin‐Like Growth Factor‐1 and Social Cognition in Huntington's Disease
Source: PubMed Central journal article supplement — Mov Disord Clin Pract. 2022 Dec 10;10(2):279–84. doi: 10.1002/mdc3.13613 (PMC9941927; doi:10.1002/mdc3.13613), 2022-12-10

### Supplemental File 1:

### Ekman scores in relation to GF-1 Levels in patients with Huntington's disease

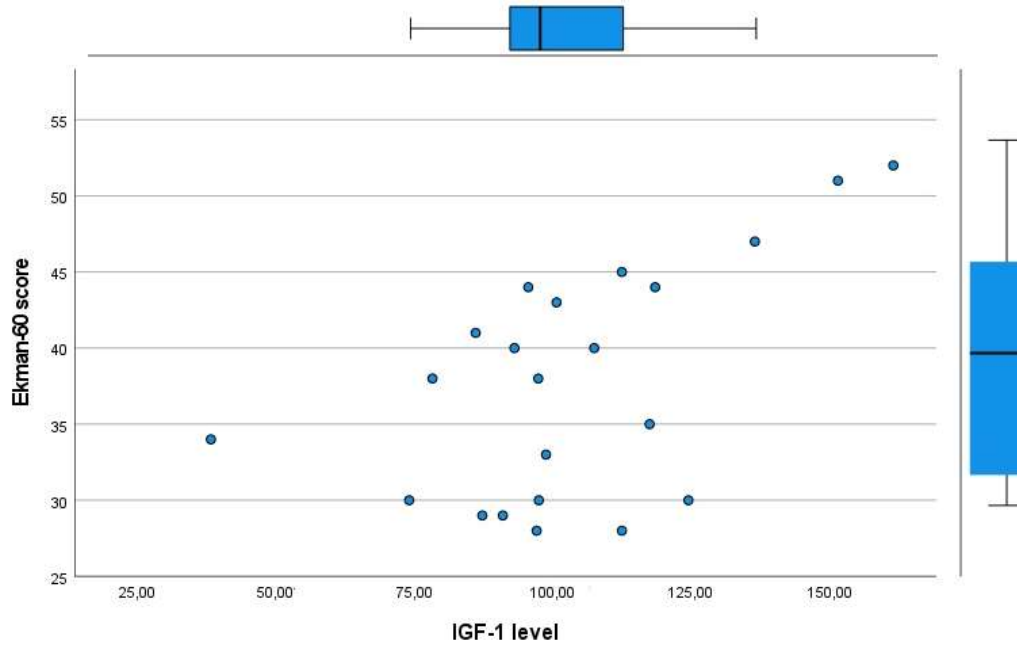

### Supplemental File 2:

### Ekman scores in relation to IGF-1 Levels in the Control Group

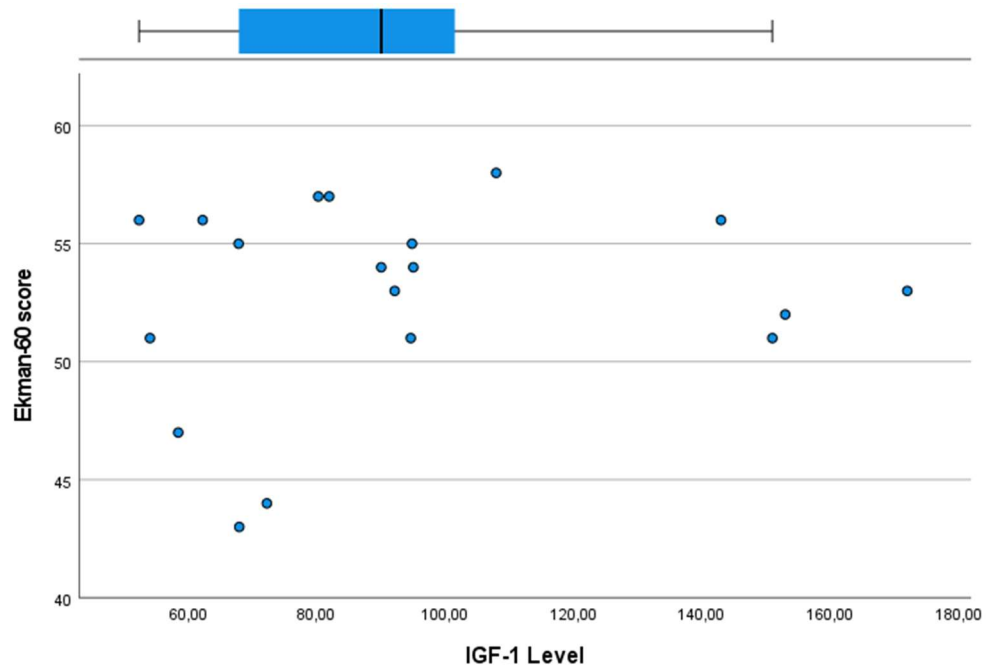

Supplement: MDC3-10-279-s002.pdf [file MDC3-10-279-s002.pdf]
